# Supplementary material for: Development and validation of the AUDEXCEL algorithm as a diagnostic tool for occupational noise-related hearing disorder
Source: PeerJ. 2025 Oct 10;13:e20149. doi: 10.7717/peerj.20149 (PMC12517279; doi:10.7717/peerj.20149)
Supplement: Supplemental Information 2 [file peerj-13-20149-s002.xlsx]

## Sheet: AUDEXCEL
						Baseline Audiogram (Left)																																				Annual Audiogram (Left)
	Legends	Repeat audiograms																																			Legends	Repeat audiograms
		Revise Baseline			500	1000	2000	3000	4000	6000	8000	(Hz)																										Revise Baseline			500	1000	2000	3000	4000	6000	8000	(Hz)
		Notify DOSH																																				Notify DOSH
	No.	Names	HL							HI (≥25)	STS (≥10)	NIHL Criteria Fulfilled	Diagnoses						DO NOT DELETE THIS TABLE															Actions			No.	Names	HL							HI (≥25)	STS (≥10)	NIHL Criteria Fulfilled	Diagnoses
			Left 0.5	Left 1	Left 2	Left 3	Left 4	Left 6	Left 8				N	HL	HI	STS	NIHL		C1 (0.5)	C1 (1)	C2 (3-0.5)	C2 (3-1)	C2 (4-0.5)	C2 (4-1)	C2 (6-0.5)	C2 (6-1)	C3 (3-8)	C3 (4-8)	C3 (6-8)	C1	C2	C3	All Criteria	Repeat	Notify & Examine				Left 0.5	Left 1	Left 2	Left 3	Left 4	Left 6	Left 8				N
	0	Calibrator (do not delete this row)	25	20	20	15	15	15	10	20		No	N						No	No	No	No	No	No	No	No	No	No	No	No	No	No	No	Audio	DOSH		0	Calibrator (do not delete this row)	10	20	20	10	30	10	10	15	3.33333	No
	1									0		No	N						Yes	Yes	No	No	No	No	No	No	No	No	No	Yes	No	No	No	Annually	No		1									0	0	No	N
	2									0		No	N						Yes	Yes	No	No	No	No	No	No	No	No	No	Yes	No	No	No	Annually	No		2									0	0	No	N
	3									0		No	N						Yes	Yes	No	No	No	No	No	No	No	No	No	Yes	No	No	No	Annually	No		3									0	0	No	N
	4									0		No	N						Yes	Yes	No	No	No	No	No	No	No	No	No	Yes	No	No	No	Annually	No		4									0	0	No	N
	5									0		No	N						Yes	Yes	No	No	No	No	No	No	No	No	No	Yes	No	No	No	Annually	No		5									0	0	No	N
	6									0		No	N						Yes	Yes	No	No	No	No	No	No	No	No	No	Yes	No	No	No	Annually	No		6									0	0	No	N
	7									0		No	N						Yes	Yes	No	No	No	No	No	No	No	No	No	Yes	No	No	No	Annually	No		7									0	0	No	N
	8									0		No	N						Yes	Yes	No	No	No	No	No	No	No	No	No	Yes	No	No	No	Annually	No		8									0	0	No	N
	9									0		No	N						Yes	Yes	No	No	No	No	No	No	No	No	No	Yes	No	No	No	Annually	No		9									0	0	No	N
	10									0		No	N						Yes	Yes	No	No	No	No	No	No	No	No	No	Yes	No	No	No	Annually	No		10									0	0	No	N
	11									0		No	N						Yes	Yes	No	No	No	No	No	No	No	No	No	Yes	No	No	No	Annually	No		11									0	0	No	N
	12									0		No	N						Yes	Yes	No	No	No	No	No	No	No	No	No	Yes	No	No	No	Annually	No		12									0	0	No	N
	13									0		No	N						Yes	Yes	No	No	No	No	No	No	No	No	No	Yes	No	No	No	Annually	No		13									0	0	No	N
	14									0		No	N						Yes	Yes	No	No	No	No	No	No	No	No	No	Yes	No	No	No	Annually	No		14									0	0	No	N
	15									0		No	N						Yes	Yes	No	No	No	No	No	No	No	No	No	Yes	No	No	No	Annually	No		15									0	0	No	N
	16									0		No	N						Yes	Yes	No	No	No	No	No	No	No	No	No	Yes	No	No	No	Annually	No		16									0	0	No	N
	17									0		No	N						Yes	Yes	No	No	No	No	No	No	No	No	No	Yes	No	No	No	Annually	No		17									0	0	No	N
	18									0		No	N						Yes	Yes	No	No	No	No	No	No	No	No	No	Yes	No	No	No	Annually	No		18									0	0	No	N
	19									0		No	N						Yes	Yes	No	No	No	No	No	No	No	No	No	Yes	No	No	No	Annually	No		19									0	0	No	N
	20									0		No	N						Yes	Yes	No	No	No	No	No	No	No	No	No	Yes	No	No	No	Annually	No		20									0	0	No	N
	21									0		No	N						Yes	Yes	No	No	No	No	No	No	No	No	No	Yes	No	No	No	Annually	No		21									0	0	No	N
	22									0		No	N						Yes	Yes	No	No	No	No	No	No	No	No	No	Yes	No	No	No	Annually	No		22									0	0	No	N
	23									0		No	N						Yes	Yes	No	No	No	No	No	No	No	No	No	Yes	No	No	No	Annually	No		23									0	0	No	N
	24									0		No	N						Yes	Yes	No	No	No	No	No	No	No	No	No	Yes	No	No	No	Annually	No		24									0	0	No	N
	25									0		No	N						Yes	Yes	No	No	No	No	No	No	No	No	No	Yes	No	No	No	Annually	No		25									0	0	No	N
	26									0		No	N						Yes	Yes	No	No	No	No	No	No	No	No	No	Yes	No	No	No	Annually	No		26									0	0	No	N
	27									0		No	N						Yes	Yes	No	No	No	No	No	No	No	No	No	Yes	No	No	No	Annually	No		27									0	0	No	N
	28									0		No	N						Yes	Yes	No	No	No	No	No	No	No	No	No	Yes	No	No	No	Annually	No		28									0	0	No	N
	29									0		No	N						Yes	Yes	No	No	No	No	No	No	No	No	No	Yes	No	No	No	Annually	No		29									0	0	No	N
	30									0		No	N						Yes	Yes	No	No	No	No	No	No	No	No	No	Yes	No	No	No	Annually	No		30									0	0	No	N
	31									0		No	N						Yes	Yes	No	No	No	No	No	No	No	No	No	Yes	No	No	No	Annually	No		31									0	0	No	N
	32									0		No	N						Yes	Yes	No	No	No	No	No	No	No	No	No	Yes	No	No	No	Annually	No		32									0	0	No	N
	33									0		No	N						Yes	Yes	No	No	No	No	No	No	No	No	No	Yes	No	No	No	Annually	No		33									0	0	No	N
	34									0		No	N						Yes	Yes	No	No	No	No	No	No	No	No	No	Yes	No	No	No	Annually	No		34									0	0	No	N
	35									0		No	N						Yes	Yes	No	No	No	No	No	No	No	No	No	Yes	No	No	No	Annually	No		35									0	0	No	N
	36									0		No	N						Yes	Yes	No	No	No	No	No	No	No	No	No	Yes	No	No	No	Annually	No		36									0	0	No	N
	37									0		No	N						Yes	Yes	No	No	No	No	No	No	No	No	No	Yes	No	No	No	Annually	No		37									0	0	No	N
	38									0		No	N						Yes	Yes	No	No	No	No	No	No	No	No	No	Yes	No	No	No	Annually	No		38									0	0	No	N
	39									0		No	N						Yes	Yes	No	No	No	No	No	No	No	No	No	Yes	No	No	No	Annually	No		39									0	0	No	N
	40									0		No	N						Yes	Yes	No	No	No	No	No	No	No	No	No	Yes	No	No	No	Annually	No		40									0	0	No	N
	41									0		No	N						Yes	Yes	No	No	No	No	No	No	No	No	No	Yes	No	No	No	Annually	No		41									0	0	No	N
	42									0		No	N						Yes	Yes	No	No	No	No	No	No	No	No	No	Yes	No	No	No	Annually	No		42									0	0	No	N
	43									0		No	N						Yes	Yes	No	No	No	No	No	No	No	No	No	Yes	No	No	No	Annually	No		43									0	0	No	N
	44									0		No	N						Yes	Yes	No	No	No	No	No	No	No	No	No	Yes	No	No	No	Annually	No		44									0	0	No	N
	45									0		No	N						Yes	Yes	No	No	No	No	No	No	No	No	No	Yes	No	No	No	Annually	No		45									0	0	No	N
	46									0		No	N						Yes	Yes	No	No	No	No	No	No	No	No	No	Yes	No	No	No	Annually	No		46									0	0	No	N
	47									0		No	N						Yes	Yes	No	No	No	No	No	No	No	No	No	Yes	No	No	No	Annually	No		47									0	0	No	N
	48									0		No	N						Yes	Yes	No	No	No	No	No	No	No	No	No	Yes	No	No	No	Annually	No		48									0	0	No	N
	49									0		No	N						Yes	Yes	No	No	No	No	No	No	No	No	No	Yes	No	No	No	Annually	No		49									0	0	No	N
	50									0		No	N						Yes	Yes	No	No	No	No	No	No	No	No	No	Yes	No	No	No	Annually	No		50									0	0	No	N
	51									0		No	N						Yes	Yes	No	No	No	No	No	No	No	No	No	Yes	No	No	No	Annually	No		51									0	0	No	N
	52									0		No	N						Yes	Yes	No	No	No	No	No	No	No	No	No	Yes	No	No	No	Annually	No		52									0	0	No	N
	53									0		No	N						Yes	Yes	No	No	No	No	No	No	No	No	No	Yes	No	No	No	Annually	No		53									0	0	No	N
	54									0		No	N						Yes	Yes	No	No	No	No	No	No	No	No	No	Yes	No	No	No	Annually	No		54									0	0	No	N
	55									0		No	N						Yes	Yes	No	No	No	No	No	No	No	No	No	Yes	No	No	No	Annually	No		55									0	0	No	N
	56									0		No	N						Yes	Yes	No	No	No	No	No	No	No	No	No	Yes	No	No	No	Annually	No		56									0	0	No	N
	57									0		No	N						Yes	Yes	No	No	No	No	No	No	No	No	No	Yes	No	No	No	Annually	No		57									0	0	No	N
	58									0		No	N						Yes	Yes	No	No	No	No	No	No	No	No	No	Yes	No	No	No	Annually	No		58									0	0	No	N
	59									0		No	N						Yes	Yes	No	No	No	No	No	No	No	No	No	Yes	No	No	No	Annually	No		59									0	0	No	N
	60									0		No	N						Yes	Yes	No	No	No	No	No	No	No	No	No	Yes	No	No	No	Annually	No		60									0	0	No	N
	61									0		No	N						Yes	Yes	No	No	No	No	No	No	No	No	No	Yes	No	No	No	Annually	No		61									0	0	No	N
	62									0		No	N						Yes	Yes	No	No	No	No	No	No	No	No	No	Yes	No	No	No	Annually	No		62									0	0	No	N
	63									0		No	N						Yes	Yes	No	No	No	No	No	No	No	No	No	Yes	No	No	No	Annually	No		63									0	0	No	N
	64									0		No	N						Yes	Yes	No	No	No	No	No	No	No	No	No	Yes	No	No	No	Annually	No		64									0	0	No	N
	65									0		No	N						Yes	Yes	No	No	No	No	No	No	No	No	No	Yes	No	No	No	Annually	No		65									0	0	No	N
	66									0		No	N						Yes	Yes	No	No	No	No	No	No	No	No	No	Yes	No	No	No	Annually	No		66									0	0	No	N
	67									0		No	N						Yes	Yes	No	No	No	No	No	No	No	No	No	Yes	No	No	No	Annually	No		67									0	0	No	N
	68									0		No	N						Yes	Yes	No	No	No	No	No	No	No	No	No	Yes	No	No	No	Annually	No		68									0	0	No	N
	69									0		No	N						Yes	Yes	No	No	No	No	No	No	No	No	No	Yes	No	No	No	Annually	No		69									0	0	No	N
	70									0		No	N						Yes	Yes	No	No	No	No	No	No	No	No	No	Yes	No	No	No	Annually	No		70									0	0	No	N
	71									0		No	N						Yes	Yes	No	No	No	No	No	No	No	No	No	Yes	No	No	No	Annually	No		71									0	0	No	N
	72									0		No	N						Yes	Yes	No	No	No	No	No	No	No	No	No	Yes	No	No	No	Annually	No		72									0	0	No	N
	73									0		No	N						Yes	Yes	No	No	No	No	No	No	No	No	No	Yes	No	No	No	Annually	No		73									0	0	No	N
	74									0		No	N						Yes	Yes	No	No	No	No	No	No	No	No	No	Yes	No	No	No	Annually	No		74									0	0	No	N
	75									0		No	N						Yes	Yes	No	No	No	No	No	No	No	No	No	Yes	No	No	No	Annually	No		75									0	0	No	N
	76									0		No	N						Yes	Yes	No	No	No	No	No	No	No	No	No	Yes	No	No	No	Annually	No		76									0	0	No	N
	77									0		No	N						Yes	Yes	No	No	No	No	No	No	No	No	No	Yes	No	No	No	Annually	No		77									0	0	No	N
	78									0		No	N						Yes	Yes	No	No	No	No	No	No	No	No	No	Yes	No	No	No	Annually	No		78									0	0	No	N
	79									0		No	N						Yes	Yes	No	No	No	No	No	No	No	No	No	Yes	No	No	No	Annually	No		79									0	0	No	N
	80									0		No	N						Yes	Yes	No	No	No	No	No	No	No	No	No	Yes	No	No	No	Annually	No		80									0	0	No	N
	81									0		No	N						Yes	Yes	No	No	No	No	No	No	No	No	No	Yes	No	No	No	Annually	No		81									0	0	No	N
	82									0		No	N						Yes	Yes	No	No	No	No	No	No	No	No	No	Yes	No	No	No	Annually	No		82									0	0	No	N
	83									0		No	N						Yes	Yes	No	No	No	No	No	No	No	No	No	Yes	No	No	No	Annually	No		83									0	0	No	N
	84									0		No	N						Yes	Yes	No	No	No	No	No	No	No	No	No	Yes	No	No	No	Annually	No		84									0	0	No	N
	85									0		No	N						Yes	Yes	No	No	No	No	No	No	No	No	No	Yes	No	No	No	Annually	No		85									0	0	No	N
	86									0		No	N						Yes	Yes	No	No	No	No	No	No	No	No	No	Yes	No	No	No	Annually	No		86									0	0	No	N
	87									0		No	N						Yes	Yes	No	No	No	No	No	No	No	No	No	Yes	No	No	No	Annually	No		87									0	0	No	N
	88									0		No	N						Yes	Yes	No	No	No	No	No	No	No	No	No	Yes	No	No	No	Annually	No		88									0	0	No	N
	89									0		No	N						Yes	Yes	No	No	No	No	No	No	No	No	No	Yes	No	No	No	Annually	No		89									0	0	No	N
	90									0		No	N						Yes	Yes	No	No	No	No	No	No	No	No	No	Yes	No	No	No	Annually	No		90									0	0	No	N
	91									0		No	N						Yes	Yes	No	No	No	No	No	No	No	No	No	Yes	No	No	No	Annually	No		91									0	0	No	N
	92									0		No	N						Yes	Yes	No	No	No	No	No	No	No	No	No	Yes	No	No	No	Annually	No		92									0	0	No	N
	93									0		No	N						Yes	Yes	No	No	No	No	No	No	No	No	No	Yes	No	No	No	Annually	No		93									0	0	No	N
	94									0		No	N						Yes	Yes	No	No	No	No	No	No	No	No	No	Yes	No	No	No	Annually	No		94									0	0	No	N
	95									0		No	N						Yes	Yes	No	No	No	No	No	No	No	No	No	Yes	No	No	No	Annually	No		95									0	0	No	N
	96									0		No	N						Yes	Yes	No	No	No	No	No	No	No	No	No	Yes	No	No	No	Annually	No		96									0	0	No	N
	97									0		No	N						Yes	Yes	No	No	No	No	No	No	No	No	No	Yes	No	No	No	Annually	No		97									0	0	No	N
	98									0		No	N						Yes	Yes	No	No	No	No	No	No	No	No	No	Yes	No	No	No	Annually	No		98									0	0	No	N
	99									0		No	N						Yes	Yes	No	No	No	No	No	No	No	No	No	Yes	No	No	No	Annually	No		99									0	0	No	N
	100									0		No	N						Yes	Yes	No	No	No	No	No	No	No	No	No	Yes	No	No	No	Annually	No		100									0	0	No	N
	101									0		No	N						Yes	Yes	No	No	No	No	No	No	No	No	No	Yes	No	No	No	Annually	No		101									0	0	No	N
	102									0		No	N						Yes	Yes	No	No	No	No	No	No	No	No	No	Yes	No	No	No	Annually	No		102									0	0	No	N
	103									0		No	N						Yes	Yes	No	No	No	No	No	No	No	No	No	Yes	No	No	No	Annually	No		103									0	0	No	N
	104									0		No	N						Yes	Yes	No	No	No	No	No	No	No	No	No	Yes	No	No	No	Annually	No		104									0	0	No	N
	105									0		No	N						Yes	Yes	No	No	No	No	No	No	No	No	No	Yes	No	No	No	Annually	No		105									0	0	No	N
	106									0		No	N						Yes	Yes	No	No	No	No	No	No	No	No	No	Yes	No	No	No	Annually	No		106									0	0	No	N
	107									0		No	N						Yes	Yes	No	No	No	No	No	No	No	No	No	Yes	No	No	No	Annually	No		107									0	0	No	N
	108									0		No	N						Yes	Yes	No	No	No	No	No	No	No	No	No	Yes	No	No	No	Annually	No		108									0	0	No	N
	109									0		No	N						Yes	Yes	No	No	No	No	No	No	No	No	No	Yes	No	No	No	Annually	No		109									0	0	No	N
	110									0		No	N						Yes	Yes	No	No	No	No	No	No	No	No	No	Yes	No	No	No	Annually	No		110									0	0	No	N
	111									0		No	N						Yes	Yes	No	No	No	No	No	No	No	No	No	Yes	No	No	No	Annually	No		111									0	0	No	N
	112									0		No	N						Yes	Yes	No	No	No	No	No	No	No	No	No	Yes	No	No	No	Annually	No		112									0	0	No	N
	113									0		No	N						Yes	Yes	No	No	No	No	No	No	No	No	No	Yes	No	No	No	Annually	No		113									0	0	No	N
	114									0		No	N						Yes	Yes	No	No	No	No	No	No	No	No	No	Yes	No	No	No	Annually	No		114									0	0	No	N
	115									0		No	N						Yes	Yes	No	No	No	No	No	No	No	No	No	Yes	No	No	No	Annually	No		115									0	0	No	N
	116									0		No	N						Yes	Yes	No	No	No	No	No	No	No	No	No	Yes	No	No	No	Annually	No		116									0	0	No	N
	117									0		No	N						Yes	Yes	No	No	No	No	No	No	No	No	No	Yes	No	No	No	Annually	No		117									0	0	No	N
	118									0		No	N						Yes	Yes	No	No	No	No	No	No	No	No	No	Yes	No	No	No	Annually	No		118									0	0	No	N
	119									0		No	N						Yes	Yes	No	No	No	No	No	No	No	No	No	Yes	No	No	No	Annually	No		119									0	0	No	N
	120									0		No	N						Yes	Yes	No	No	No	No	No	No	No	No	No	Yes	No	No	No	Annually	No		120									0	0	No	N
	121									0		No	N						Yes	Yes	No	No	No	No	No	No	No	No	No	Yes	No	No	No	Annually	No		121									0	0	No	N
	122									0		No	N						Yes	Yes	No	No	No	No	No	No	No	No	No	Yes	No	No	No	Annually	No		122									0	0	No	N
	123									0		No	N						Yes	Yes	No	No	No	No	No	No	No	No	No	Yes	No	No	No	Annually	No		123									0	0	No	N
	124									0		No	N						Yes	Yes	No	No	No	No	No	No	No	No	No	Yes	No	No	No	Annually	No		124									0	0	No	N
	125									0		No	N						Yes	Yes	No	No	No	No	No	No	No	No	No	Yes	No	No	No	Annually	No		125									0	0	No	N
	126									0		No	N						Yes	Yes	No	No	No	No	No	No	No	No	No	Yes	No	No	No	Annually	No		126									0	0	No	N
	127									0		No	N						Yes	Yes	No	No	No	No	No	No	No	No	No	Yes	No	No	No	Annually	No		127									0	0	No	N
	128									0		No	N						Yes	Yes	No	No	No	No	No	No	No	No	No	Yes	No	No	No	Annually	No		128									0	0	No	N
	129									0		No	N						Yes	Yes	No	No	No	No	No	No	No	No	No	Yes	No	No	No	Annually	No		129									0	0	No	N
	130									0		No	N						Yes	Yes	No	No	No	No	No	No	No	No	No	Yes	No	No	No	Annually	No		130									0	0	No	N
	131									0		No	N						Yes	Yes	No	No	No	No	No	No	No	No	No	Yes	No	No	No	Annually	No		131									0	0	No	N
	132									0		No	N						Yes	Yes	No	No	No	No	No	No	No	No	No	Yes	No	No	No	Annually	No		132									0	0	No	N
	133									0		No	N						Yes	Yes	No	No	No	No	No	No	No	No	No	Yes	No	No	No	Annually	No		133									0	0	No	N
	134									0		No	N						Yes	Yes	No	No	No	No	No	No	No	No	No	Yes	No	No	No	Annually	No		134									0	0	No	N
	135									0		No	N						Yes	Yes	No	No	No	No	No	No	No	No	No	Yes	No	No	No	Annually	No		135									0	0	No	N
	136									0		No	N						Yes	Yes	No	No	No	No	No	No	No	No	No	Yes	No	No	No	Annually	No		136									0	0	No	N
	137									0		No	N						Yes	Yes	No	No	No	No	No	No	No	No	No	Yes	No	No	No	Annually	No		137									0	0	No	N
	138									0		No	N						Yes	Yes	No	No	No	No	No	No	No	No	No	Yes	No	No	No	Annually	No		138									0	0	No	N
	139									0		No	N						Yes	Yes	No	No	No	No	No	No	No	No	No	Yes	No	No	No	Annually	No		139									0	0	No	N
	140									0		No	N						Yes	Yes	No	No	No	No	No	No	No	No	No	Yes	No	No	No	Annually	No		140									0	0	No	N
	141									0		No	N						Yes	Yes	No	No	No	No	No	No	No	No	No	Yes	No	No	No	Annually	No		141									0	0	No	N
	142									0		No	N						Yes	Yes	No	No	No	No	No	No	No	No	No	Yes	No	No	No	Annually	No		142									0	0	No	N
	143									0		No	N						Yes	Yes	No	No	No	No	No	No	No	No	No	Yes	No	No	No	Annually	No		143									0	0	No	N
	144									0		No	N						Yes	Yes	No	No	No	No	No	No	No	No	No	Yes	No	No	No	Annually	No		144									0	0	No	N
	145									0		No	N						Yes	Yes	No	No	No	No	No	No	No	No	No	Yes	No	No	No	Annually	No		145									0	0	No	N
	146									0		No	N						Yes	Yes	No	No	No	No	No	No	No	No	No	Yes	No	No	No	Annually	No		146									0	0	No	N
	147									0		No	N						Yes	Yes	No	No	No	No	No	No	No	No	No	Yes	No	No	No	Annually	No		147									0	0	No	N
	148									0		No	N						Yes	Yes	No	No	No	No	No	No	No	No	No	Yes	No	No	No	Annually	No		148									0	0	No	N
	149									0		No	N						Yes	Yes	No	No	No	No	No	No	No	No	No	Yes	No	No	No	Annually	No		149									0	0	No	N
	150									0		No	N						Yes	Yes	No	No	No	No	No	No	No	No	No	Yes	No	No	No	Annually	No		150									0	0	No	N
	151									0		No	N						Yes	Yes	No	No	No	No	No	No	No	No	No	Yes	No	No	No	Annually	No		151									0	0	No	N
	152									0		No	N						Yes	Yes	No	No	No	No	No	No	No	No	No	Yes	No	No	No	Annually	No		152									0	0	No	N
	153									0		No	N						Yes	Yes	No	No	No	No	No	No	No	No	No	Yes	No	No	No	Annually	No		153									0	0	No	N
	154									0		No	N						Yes	Yes	No	No	No	No	No	No	No	No	No	Yes	No	No	No	Annually	No		154									0	0	No	N
	155									0		No	N						Yes	Yes	No	No	No	No	No	No	No	No	No	Yes	No	No	No	Annually	No		155									0	0	No	N
	156									0		No	N						Yes	Yes	No	No	No	No	No	No	No	No	No	Yes	No	No	No	Annually	No		156									0	0	No	N
	157									0		No	N						Yes	Yes	No	No	No	No	No	No	No	No	No	Yes	No	No	No	Annually	No		157									0	0	No	N
	158									0		No	N						Yes	Yes	No	No	No	No	No	No	No	No	No	Yes	No	No	No	Annually	No		158									0	0	No	N
	159									0		No	N						Yes	Yes	No	No	No	No	No	No	No	No	No	Yes	No	No	No	Annually	No		159									0	0	No	N
	160									0		No	N						Yes	Yes	No	No	No	No	No	No	No	No	No	Yes	No	No	No	Annually	No		160									0	0	No	N
	161									0		No	N						Yes	Yes	No	No	No	No	No	No	No	No	No	Yes	No	No	No	Annually	No		161									0	0	No	N
	162									0		No	N						Yes	Yes	No	No	No	No	No	No	No	No	No	Yes	No	No	No	Annually	No		162									0	0	No	N
	163									0		No	N						Yes	Yes	No	No	No	No	No	No	No	No	No	Yes	No	No	No	Annually	No		163									0	0	No	N
	164									0		No	N						Yes	Yes	No	No	No	No	No	No	No	No	No	Yes	No	No	No	Annually	No		164									0	0	No	N
	165									0		No	N						Yes	Yes	No	No	No	No	No	No	No	No	No	Yes	No	No	No	Annually	No		165									0	0	No	N
	166									0		No	N						Yes	Yes	No	No	No	No	No	No	No	No	No	Yes	No	No	No	Annually	No		166									0	0	No	N
	167									0		No	N						Yes	Yes	No	No	No	No	No	No	No	No	No	Yes	No	No	No	Annually	No		167									0	0	No	N
	168									0		No	N						Yes	Yes	No	No	No	No	No	No	No	No	No	Yes	No	No	No	Annually	No		168									0	0	No	N
	169									0		No	N						Yes	Yes	No	No	No	No	No	No	No	No	No	Yes	No	No	No	Annually	No		169									0	0	No	N
	170									0		No	N						Yes	Yes	No	No	No	No	No	No	No	No	No	Yes	No	No	No	Annually	No		170									0	0	No	N
	171									0		No	N						Yes	Yes	No	No	No	No	No	No	No	No	No	Yes	No	No	No	Annually	No		171									0	0	No	N
	172									0		No	N						Yes	Yes	No	No	No	No	No	No	No	No	No	Yes	No	No	No	Annually	No		172									0	0	No	N
	173									0		No	N						Yes	Yes	No	No	No	No	No	No	No	No	No	Yes	No	No	No	Annually	No		173									0	0	No	N
	174									0		No	N						Yes	Yes	No	No	No	No	No	No	No	No	No	Yes	No	No	No	Annually	No		174									0	0	No	N
	175									0		No	N						Yes	Yes	No	No	No	No	No	No	No	No	No	Yes	No	No	No	Annually	No		175									0	0	No	N
	176									0		No	N						Yes	Yes	No	No	No	No	No	No	No	No	No	Yes	No	No	No	Annually	No		176									0	0	No	N
	177									0		No	N						Yes	Yes	No	No	No	No	No	No	No	No	No	Yes	No	No	No	Annually	No		177									0	0	No	N
	178									0		No	N						Yes	Yes	No	No	No	No	No	No	No	No	No	Yes	No	No	No	Annually	No		178									0	0	No	N
	179									0		No	N						Yes	Yes	No	No	No	No	No	No	No	No	No	Yes	No	No	No	Annually	No		179									0	0	No	N
	180									0		No	N						Yes	Yes	No	No	No	No	No	No	No	No	No	Yes	No	No	No	Annually	No		180									0	0	No	N
	181									0		No	N						Yes	Yes	No	No	No	No	No	No	No	No	No	Yes	No	No	No	Annually	No		181									0	0	No	N
	182									0		No	N						Yes	Yes	No	No	No	No	No	No	No	No	No	Yes	No	No	No	Annually	No		182									0	0	No	N
	183									0		No	N						Yes	Yes	No	No	No	No	No	No	No	No	No	Yes	No	No	No	Annually	No		183									0	0	No	N
	184									0		No	N						Yes	Yes	No	No	No	No	No	No	No	No	No	Yes	No	No	No	Annually	No		184									0	0	No	N
	185									0		No	N						Yes	Yes	No	No	No	No	No	No	No	No	No	Yes	No	No	No	Annually	No		185									0	0	No	N
	186									0		No	N						Yes	Yes	No	No	No	No	No	No	No	No	No	Yes	No	No	No	Annually	No		186									0	0	No	N
	187									0		No	N						Yes	Yes	No	No	No	No	No	No	No	No	No	Yes	No	No	No	Annually	No		187									0	0	No	N
	188									0		No	N						Yes	Yes	No	No	No	No	No	No	No	No	No	Yes	No	No	No	Annually	No		188									0	0	No	N
	189									0		No	N						Yes	Yes	No	No	No	No	No	No	No	No	No	Yes	No	No	No	Annually	No		189									0	0	No	N
	190									0		No	N						Yes	Yes	No	No	No	No	No	No	No	No	No	Yes	No	No	No	Annually	No		190									0	0	No	N
	191									0		No	N						Yes	Yes	No	No	No	No	No	No	No	No	No	Yes	No	No	No	Annually	No		191									0	0	No	N
	192									0		No	N						Yes	Yes	No	No	No	No	No	No	No	No	No	Yes	No	No	No	Annually	No		192									0	0	No	N
	193									0		No	N						Yes	Yes	No	No	No	No	No	No	No	No	No	Yes	No	No	No	Annually	No		193									0	0	No	N
	194									0		No	N						Yes	Yes	No	No	No	No	No	No	No	No	No	Yes	No	No	No	Annually	No		194									0	0	No	N
	195									0		No	N						Yes	Yes	No	No	No	No	No	No	No	No	No	Yes	No	No	No	Annually	No		195									0	0	No	N
	196									0		No	N						Yes	Yes	No	No	No	No	No	No	No	No	No	Yes	No	No	No	Annually	No		196									0	0	No	N
	197									0		No	N						Yes	Yes	No	No	No	No	No	No	No	No	No	Yes	No	No	No	Annually	No		197									0	0	No	N
	198									0		No	N						Yes	Yes	No	No	No	No	No	No	No	No	No	Yes	No	No	No	Annually	No		198									0	0	No	N
	199									0		No	N						Yes	Yes	No	No	No	No	No	No	No	No	No	Yes	No	No	No	Annually	No		199									0	0	No	N
	200									0		No	N						Yes	Yes	No	No	No	No	No	No	No	No	No	Yes	No	No	No	Annually	No		200									0	0	No	N
	201									0		No	N						Yes	Yes	No	No	No	No	No	No	No	No	No	Yes	No	No	No	Annually	No		201									0	0	No	N
	202									0		No	N						Yes	Yes	No	No	No	No	No	No	No	No	No	Yes	No	No	No	Annually	No		202									0	0	No	N
	203									0		No	N						Yes	Yes	No	No	No	No	No	No	No	No	No	Yes	No	No	No	Annually	No		203									0	0	No	N
	204									0		No	N						Yes	Yes	No	No	No	No	No	No	No	No	No	Yes	No	No	No	Annually	No		204									0	0	No	N
	205									0		No	N						Yes	Yes	No	No	No	No	No	No	No	No	No	Yes	No	No	No	Annually	No		205									0	0	No	N
	206									0		No	N						Yes	Yes	No	No	No	No	No	No	No	No	No	Yes	No	No	No	Annually	No		206									0	0	No	N
	207									0		No	N						Yes	Yes	No	No	No	No	No	No	No	No	No	Yes	No	No	No	Annually	No		207									0	0	No	N
	208									0		No	N						Yes	Yes	No	No	No	No	No	No	No	No	No	Yes	No	No	No	Annually	No		208									0	0	No	N
	209									0		No	N						Yes	Yes	No	No	No	No	No	No	No	No	No	Yes	No	No	No	Annually	No		209									0	0	No	N
	210									0		No	N						Yes	Yes	No	No	No	No	No	No	No	No	No	Yes	No	No	No	Annually	No		210									0	0	No	N
	211									0		No	N						Yes	Yes	No	No	No	No	No	No	No	No	No	Yes	No	No	No	Annually	No		211									0	0	No	N
	212									0		No	N						Yes	Yes	No	No	No	No	No	No	No	No	No	Yes	No	No	No	Annually	No		212									0	0	No	N
	213									0		No	N						Yes	Yes	No	No	No	No	No	No	No	No	No	Yes	No	No	No	Annually	No		213									0	0	No	N
	214									0		No	N						Yes	Yes	No	No	No	No	No	No	No	No	No	Yes	No	No	No	Annually	No		214									0	0	No	N
	215									0		No	N						Yes	Yes	No	No	No	No	No	No	No	No	No	Yes	No	No	No	Annually	No		215									0	0	No	N
	216									0		No	N						Yes	Yes	No	No	No	No	No	No	No	No	No	Yes	No	No	No	Annually	No		216									0	0	No	N
	217									0		No	N						Yes	Yes	No	No	No	No	No	No	No	No	No	Yes	No	No	No	Annually	No		217									0	0	No	N
	218									0		No	N						Yes	Yes	No	No	No	No	No	No	No	No	No	Yes	No	No	No	Annually	No		218									0	0	No	N
	219									0		No	N						Yes	Yes	No	No	No	No	No	No	No	No	No	Yes	No	No	No	Annually	No		219									0	0	No	N
	220									0		No	N						Yes	Yes	No	No	No	No	No	No	No	No	No	Yes	No	No	No	Annually	No		220									0	0	No	N
	221									0		No	N						Yes	Yes	No	No	No	No	No	No	No	No	No	Yes	No	No	No	Annually	No		221									0	0	No	N
	222									0		No	N						Yes	Yes	No	No	No	No	No	No	No	No	No	Yes	No	No	No	Annually	No		222									0	0	No	N
	223									0		No	N						Yes	Yes	No	No	No	No	No	No	No	No	No	Yes	No	No	No	Annually	No		223									0	0	No	N
	224									0		No	N						Yes	Yes	No	No	No	No	No	No	No	No	No	Yes	No	No	No	Annually	No		224									0	0	No	N
	225									0		No	N						Yes	Yes	No	No	No	No	No	No	No	No	No	Yes	No	No	No	Annually	No		225									0	0	No	N
	226									0		No	N						Yes	Yes	No	No	No	No	No	No	No	No	No	Yes	No	No	No	Annually	No		226									0	0	No	N
	227									0		No	N						Yes	Yes	No	No	No	No	No	No	No	No	No	Yes	No	No	No	Annually	No		227									0	0	No	N
	228									0		No	N						Yes	Yes	No	No	No	No	No	No	No	No	No	Yes	No	No	No	Annually	No		228									0	0	No	N
	229									0		No	N						Yes	Yes	No	No	No	No	No	No	No	No	No	Yes	No	No	No	Annually	No		229									0	0	No	N
	230									0		No	N						Yes	Yes	No	No	No	No	No	No	No	No	No	Yes	No	No	No	Annually	No		230									0	0	No	N
	231									0		No	N						Yes	Yes	No	No	No	No	No	No	No	No	No	Yes	No	No	No	Annually	No		231									0	0	No	N
	232									0		No	N						Yes	Yes	No	No	No	No	No	No	No	No	No	Yes	No	No	No	Annually	No		232									0	0	No	N
	233									0		No	N						Yes	Yes	No	No	No	No	No	No	No	No	No	Yes	No	No	No	Annually	No		233									0	0	No	N
	234									0		No	N						Yes	Yes	No	No	No	No	No	No	No	No	No	Yes	No	No	No	Annually	No		234									0	0	No	N
	235									0		No	N						Yes	Yes	No	No	No	No	No	No	No	No	No	Yes	No	No	No	Annually	No		235									0	0	No	N
	236									0		No	N						Yes	Yes	No	No	No	No	No	No	No	No	No	Yes	No	No	No	Annually	No		236									0	0	No	N
	237									0		No	N						Yes	Yes	No	No	No	No	No	No	No	No	No	Yes	No	No	No	Annually	No		237									0	0	No	N
	238									0		No	N						Yes	Yes	No	No	No	No	No	No	No	No	No	Yes	No	No	No	Annually	No		238									0	0	No	N
	239									0		No	N						Yes	Yes	No	No	No	No	No	No	No	No	No	Yes	No	No	No	Annually	No		239									0	0	No	N
	240									0		No	N						Yes	Yes	No	No	No	No	No	No	No	No	No	Yes	No	No	No	Annually	No		240									0	0	No	N
	241									0		No	N						Yes	Yes	No	No	No	No	No	No	No	No	No	Yes	No	No	No	Annually	No		241									0	0	No	N
	242									0		No	N						Yes	Yes	No	No	No	No	No	No	No	No	No	Yes	No	No	No	Annually	No		242									0	0	No	N
	243									0		No	N						Yes	Yes	No	No	No	No	No	No	No	No	No	Yes	No	No	No	Annually	No		243									0	0	No	N
	244									0		No	N						Yes	Yes	No	No	No	No	No	No	No	No	No	Yes	No	No	No	Annually	No		244									0	0	No	N
	245									0		No	N						Yes	Yes	No	No	No	No	No	No	No	No	No	Yes	No	No	No	Annually	No		245									0	0	No	N
	246									0		No	N						Yes	Yes	No	No	No	No	No	No	No	No	No	Yes	No	No	No	Annually	No		246									0	0	No	N
	247									0		No	N						Yes	Yes	No	No	No	No	No	No	No	No	No	Yes	No	No	No	Annually	No		247									0	0	No	N
	248									0		No	N						Yes	Yes	No	No	No	No	No	No	No	No	No	Yes	No	No	No	Annually	No		248									0	0	No	N
	249									0		No	N						Yes	Yes	No	No	No	No	No	No	No	No	No	Yes	No	No	No	Annually	No		249									0	0	No	N
	250									0		No	N						Yes	Yes	No	No	No	No	No	No	No	No	No	Yes	No	No	No	Annually	No		250									0	0	No	N
	251									0		No	N						Yes	Yes	No	No	No	No	No	No	No	No	No	Yes	No	No	No	Annually	No		251									0	0	No	N
	252									0		No	N						Yes	Yes	No	No	No	No	No	No	No	No	No	Yes	No	No	No	Annually	No		252									0	0	No	N
	253									0		No	N						Yes	Yes	No	No	No	No	No	No	No	No	No	Yes	No	No	No	Annually	No		253									0	0	No	N
	254									0		No	N						Yes	Yes	No	No	No	No	No	No	No	No	No	Yes	No	No	No	Annually	No		254									0	0	No	N
	255									0		No	N						Yes	Yes	No	No	No	No	No	No	No	No	No	Yes	No	No	No	Annually	No		255									0	0	No	N
	256									0		No	N						Yes	Yes	No	No	No	No	No	No	No	No	No	Yes	No	No	No	Annually	No		256									0	0	No	N
	257									0		No	N						Yes	Yes	No	No	No	No	No	No	No	No	No	Yes	No	No	No	Annually	No		257									0	0	No	N
	258									0		No	N						Yes	Yes	No	No	No	No	No	No	No	No	No	Yes	No	No	No	Annually	No		258									0	0	No	N
	259									0		No	N						Yes	Yes	No	No	No	No	No	No	No	No	No	Yes	No	No	No	Annually	No		259									0	0	No	N
	260									0		No	N						Yes	Yes	No	No	No	No	No	No	No	No	No	Yes	No	No	No	Annually	No		260									0	0	No	N
	261									0		No	N						Yes	Yes	No	No	No	No	No	No	No	No	No	Yes	No	No	No	Annually	No		261									0	0	No	N
	262									0		No	N						Yes	Yes	No	No	No	No	No	No	No	No	No	Yes	No	No	No	Annually	No		262									0	0	No	N
	263									0		No	N						Yes	Yes	No	No	No	No	No	No	No	No	No	Yes	No	No	No	Annually	No		263									0	0	No	N
	264									0		No	N						Yes	Yes	No	No	No	No	No	No	No	No	No	Yes	No	No	No	Annually	No		264									0	0	No	N
	265									0		No	N						Yes	Yes	No	No	No	No	No	No	No	No	No	Yes	No	No	No	Annually	No		265									0	0	No	N
	266									0		No	N						Yes	Yes	No	No	No	No	No	No	No	No	No	Yes	No	No	No	Annually	No		266									0	0	No	N
	267									0		No	N						Yes	Yes	No	No	No	No	No	No	No	No	No	Yes	No	No	No	Annually	No		267									0	0	No	N
	268									0		No	N						Yes	Yes	No	No	No	No	No	No	No	No	No	Yes	No	No	No	Annually	No		268									0	0	No	N
	269									0		No	N						Yes	Yes	No	No	No	No	No	No	No	No	No	Yes	No	No	No	Annually	No		269									0	0	No	N
	270									0		No	N						Yes	Yes	No	No	No	No	No	No	No	No	No	Yes	No	No	No	Annually	No		270									0	0	No	N
	271									0		No	N						Yes	Yes	No	No	No	No	No	No	No	No	No	Yes	No	No	No	Annually	No		271									0	0	No	N
	272									0		No	N						Yes	Yes	No	No	No	No	No	No	No	No	No	Yes	No	No	No	Annually	No		272									0	0	No	N
	273									0		No	N						Yes	Yes	No	No	No	No	No	No	No	No	No	Yes	No	No	No	Annually	No		273									0	0	No	N
	274									0		No	N						Yes	Yes	No	No	No	No	No	No	No	No	No	Yes	No	No	No	Annually	No		274									0	0	No	N
	275									0		No	N						Yes	Yes	No	No	No	No	No	No	No	No	No	Yes	No	No	No	Annually	No		275									0	0	No	N
	276									0		No	N						Yes	Yes	No	No	No	No	No	No	No	No	No	Yes	No	No	No	Annually	No		276									0	0	No	N
	277									0		No	N						Yes	Yes	No	No	No	No	No	No	No	No	No	Yes	No	No	No	Annually	No		277									0	0	No	N
	278									0		No	N						Yes	Yes	No	No	No	No	No	No	No	No	No	Yes	No	No	No	Annually	No		278									0	0	No	N
	279									0		No	N						Yes	Yes	No	No	No	No	No	No	No	No	No	Yes	No	No	No	Annually	No		279									0	0	No	N
	280									0		No	N						Yes	Yes	No	No	No	No	No	No	No	No	No	Yes	No	No	No	Annually	No		280									0	0	No	N
	281									0		No	N						Yes	Yes	No	No	No	No	No	No	No	No	No	Yes	No	No	No	Annually	No		281									0	0	No	N
	282									0		No	N						Yes	Yes	No	No	No	No	No	No	No	No	No	Yes	No	No	No	Annually	No		282									0	0	No	N
	283									0		No	N						Yes	Yes	No	No	No	No	No	No	No	No	No	Yes	No	No	No	Annually	No		283									0	0	No	N
	284									0		No	N						Yes	Yes	No	No	No	No	No	No	No	No	No	Yes	No	No	No	Annually	No		284									0	0	No	N
	285									0		No	N						Yes	Yes	No	No	No	No	No	No	No	No	No	Yes	No	No	No	Annually	No		285									0	0	No	N
	286									0		No	N						Yes	Yes	No	No	No	No	No	No	No	No	No	Yes	No	No	No	Annually	No		286									0	0	No	N
	287									0		No	N						Yes	Yes	No	No	No	No	No	No	No	No	No	Yes	No	No	No	Annually	No		287									0	0	No	N
	288									0		No	N						Yes	Yes	No	No	No	No	No	No	No	No	No	Yes	No	No	No	Annually	No		288									0	0	No	N
	289									0		No	N						Yes	Yes	No	No	No	No	No	No	No	No	No	Yes	No	No	No	Annually	No		289									0	0	No	N
	290									0		No	N						Yes	Yes	No	No	No	No	No	No	No	No	No	Yes	No	No	No	Annually	No		290									0	0	No	N
	291									0		No	N						Yes	Yes	No	No	No	No	No	No	No	No	No	Yes	No	No	No	Annually	No		291									0	0	No	N
	292									0		No	N						Yes	Yes	No	No	No	No	No	No	No	No	No	Yes	No	No	No	Annually	No		292									0	0	No	N
	293									0		No	N						Yes	Yes	No	No	No	No	No	No	No	No	No	Yes	No	No	No	Annually	No		293									0	0	No	N
	294									0		No	N						Yes	Yes	No	No	No	No	No	No	No	No	No	Yes	No	No	No	Annually	No		294									0	0	No	N
	295									0		No	N						Yes	Yes	No	No	No	No	No	No	No	No	No	Yes	No	No	No	Annually	No		295									0	0	No	N
	296									0		No	N						Yes	Yes	No	No	No	No	No	No	No	No	No	Yes	No	No	No	Annually	No		296									0	0	No	N
	297									0		No	N						Yes	Yes	No	No	No	No	No	No	No	No	No	Yes	No	No	No	Annually	No		297									0	0	No	N
	298									0		No	N						Yes	Yes	No	No	No	No	No	No	No	No	No	Yes	No	No	No	Annually	No		298									0	0	No	N
	299									0		No	N						Yes	Yes	No	No	No	No	No	No	No	No	No	Yes	No	No	No	Annually	No		299									0	0	No	N
	300									0		No	N						Yes	Yes	No	No	No	No	No	No	No	No	No	Yes	No	No	No	Annually	No		300									0	0	No	N
[truncated: 155 more columns]
